# Supplementary material
Source: MDPI journal article supplement (https://www.mdpi.com/2227-7080/11/5/137)
Supplement: s1 [file s1]

# Support Information of: Effect of PLGA Concentration in Electrospinning Solution on Biocompatibility, Morphology and Mechanical Properties of Nonwoven Scaffolds

Arsalan D. Badaraev <sup>1</sup>, Tuan-Hoang Tran <sup>1</sup>, Anastasia Drozd <sup>1</sup>, Evgenii V. Plotnikov <sup>1,2</sup>, Anna I. Kozelskaya <sup>1</sup>, Sven Rutkowski <sup>1\*</sup> and Sergei I. Tverdokhlebov <sup>1\*</sup>

<sup>1</sup> National Research Tomsk Polytechnic University, 30 Lenin Avenue, 634050 Tomsk, Russia

<sup>2</sup> Mental Health Research Institute. Tomsk National Research Medical Center of the Russian Academy of Sciences, Aleutskaya Street 4, 634014 Tomsk, Russia

\* Correspondence: rutkowski\_s@tpu.ru (S.R.); tverd@tpu.ru (S.I.T.)

Supporting Figures:

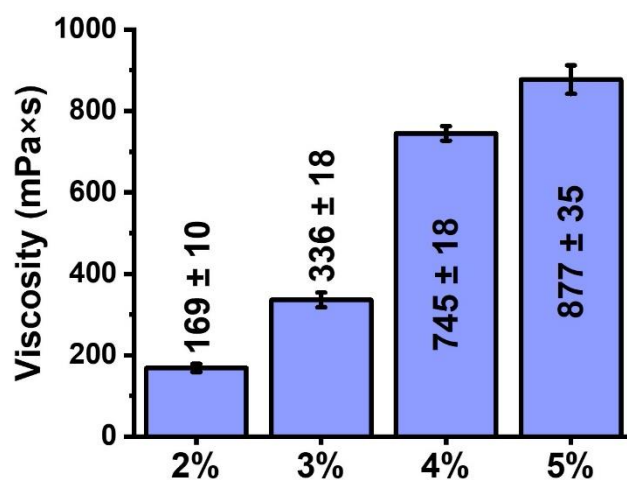

**Figure S1.** Viscosity and of poly(lactide-co-glycolide) (PLGA) electrospinning solutions prepared with different concentrations of PLGA (2, 3, 4 and 5 wt.%) dissolved in hexafluoro-2-propanol (HFIP).

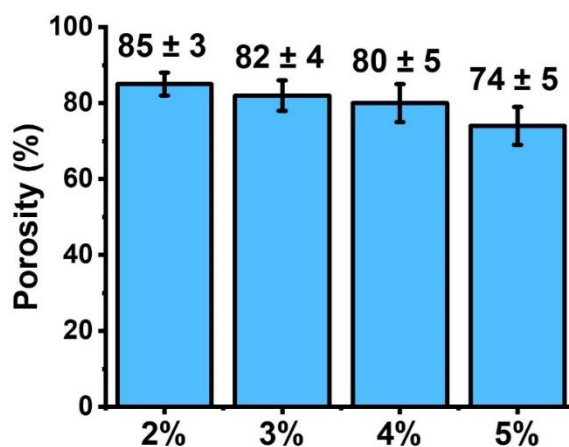

**Figure S2.** Porosity of the poly(lactide-co-glycolide) (PLGA) scaffolds under investigation, measured by the gravimetric method (for more details, see chapter 2.5 in the main manuscript).

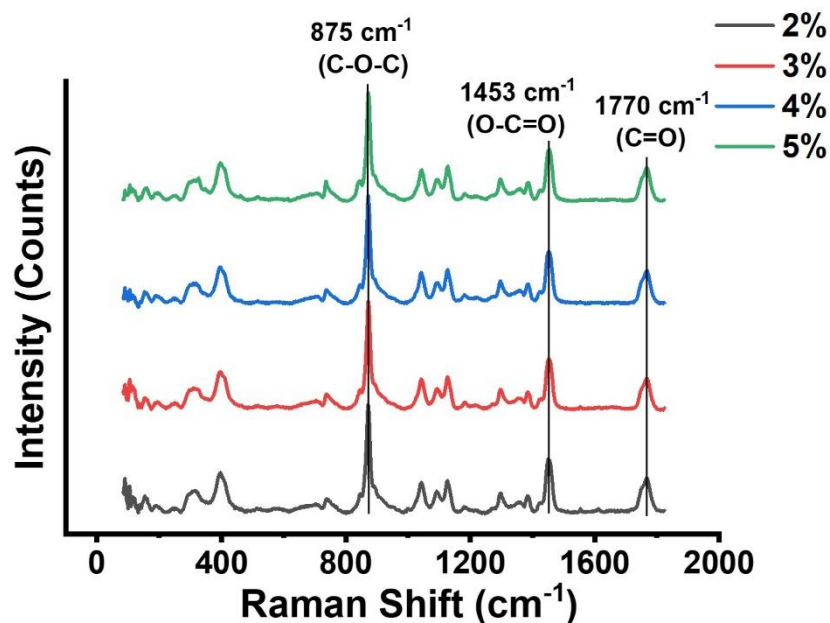

**Figure S3.** Raman spectra of the studied poly(lactide-co-glycolide) (PLGA) scaffolds made from electrospinning solutions with different PLGA concentrations (2, 3, 4 and 5 wt.%) dissolved in hexafluoro-2-propanol (HFIP).

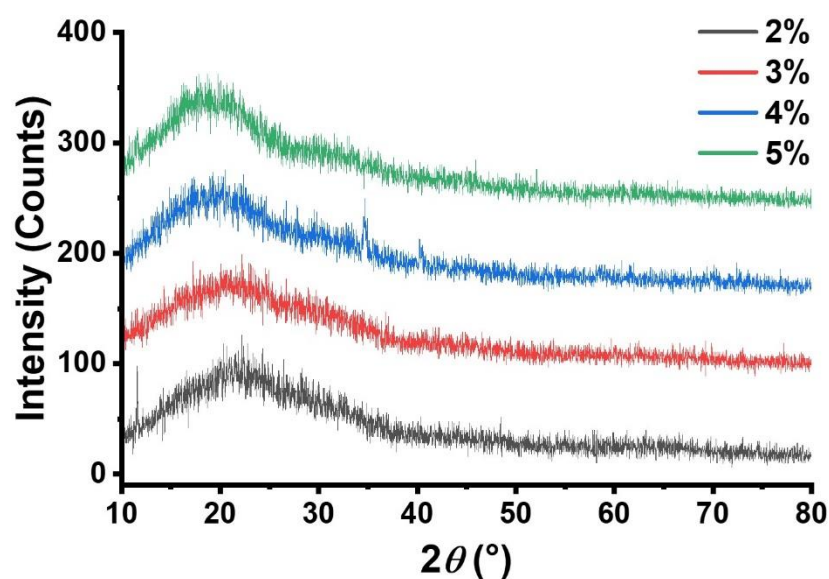

**Figure S4.** X-ray diffractograms of poly(lactide-co-glycolide) (PLGA) scaffolds made from electrospinning solutions with different PLGA concentrations (2, 3, 4 and 5 wt.%) dissolved in hexafluoro-2-propanol (HFIP).

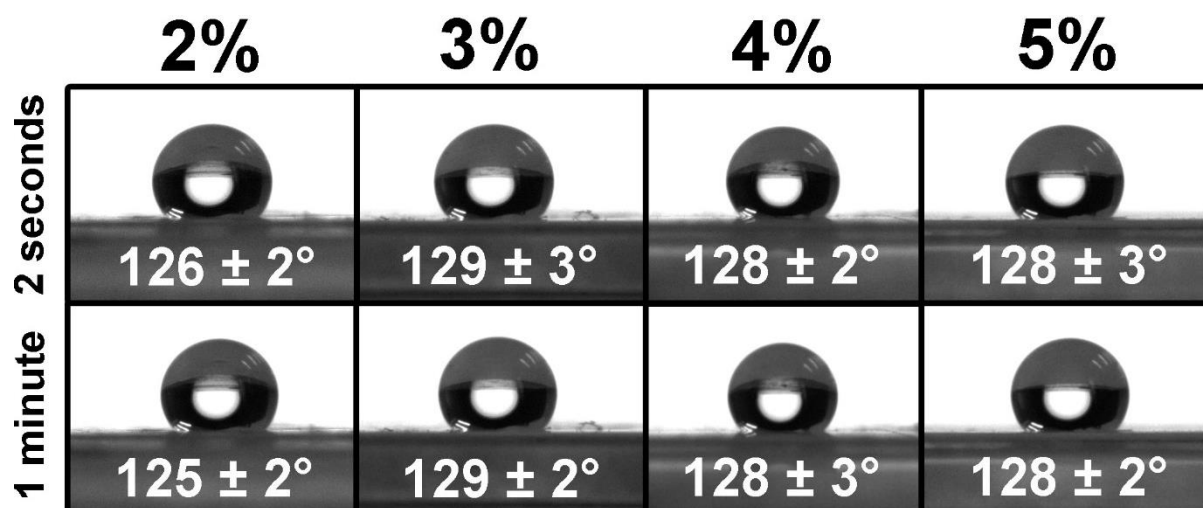

**Figure S5.** Images of water droplets with the corresponding water contact angles after 2 seconds (top row) and after 1 minute (bottom row) on the surface of poly(lactide-co-glycolide) (PLGA) scaffolds prepared from electrospinning solutions with different PLGA concentrations (2, 3, 4 and 5 wt.%) dissolved in hexafluoro-2-propanol (HFIP).

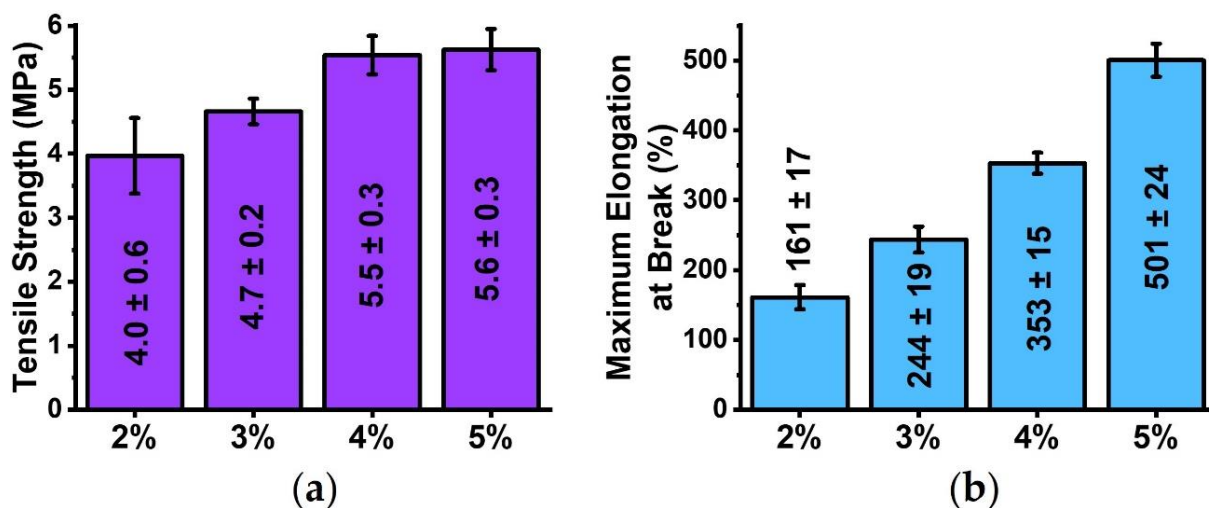

**Figure S6.** Mechanical properties of the prepared poly(lactide-co-glycolide) (PLGA) scaffolds made from electrospinning solutions with different PLGA polymer concentrations (2, 3, 4 and 5 wt.%) dissolved in hexafluoro-2-propanol (HFIP): a) tensile strength of the PLGA scaffolds under investigation and b) maximum elongation at break.

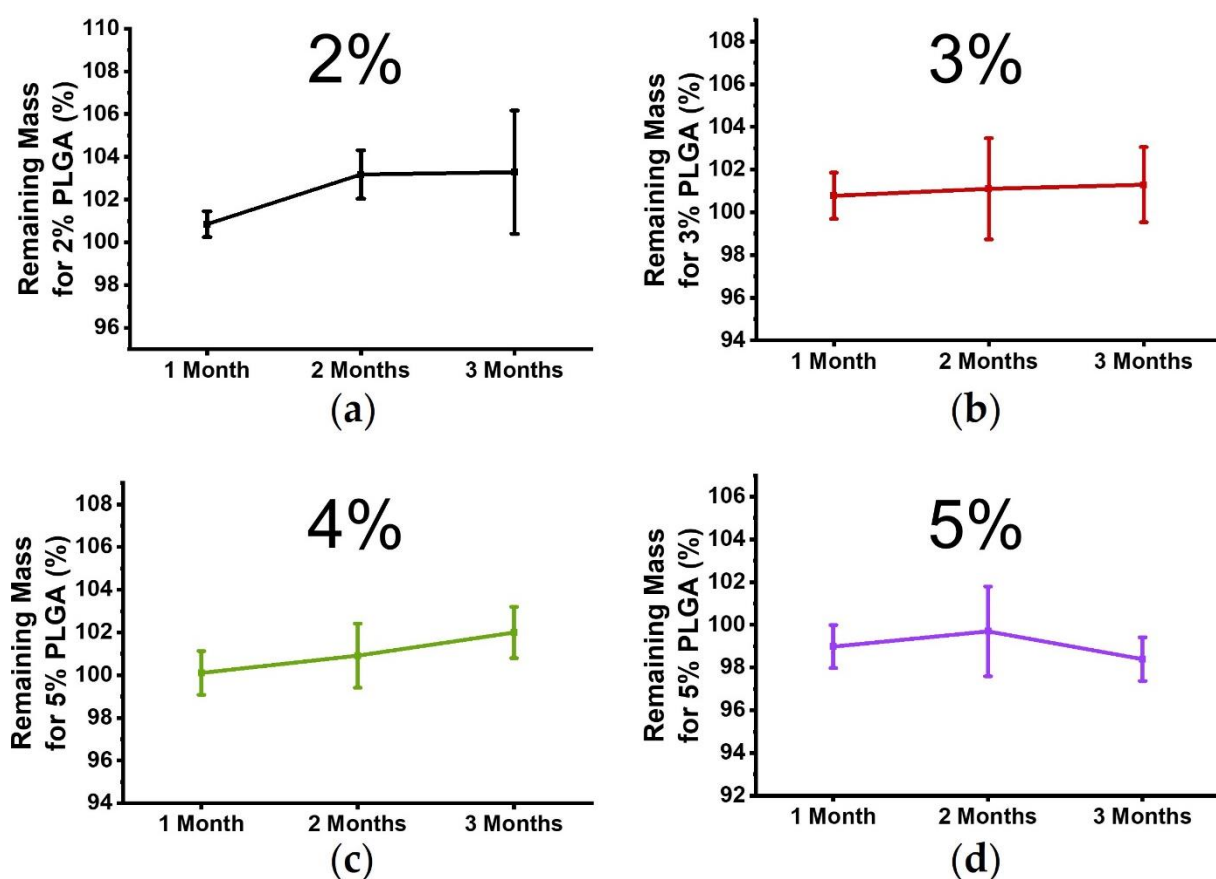

**Figure S7.** Relative remaining mass of poly(lactide-co-glycolide) (PLGA) scaffolds, prepared from electrospinning solutions with different polymer concentrations (2, 3, 4 and 5 wt.%) dissolved in hexafluoro-2-propanol (HFIP) and immersed in phosphate buffer saline (PBS) for 1, 2 or 3 months: a) 2%, b) 3%, c) 4%, d) 5%.

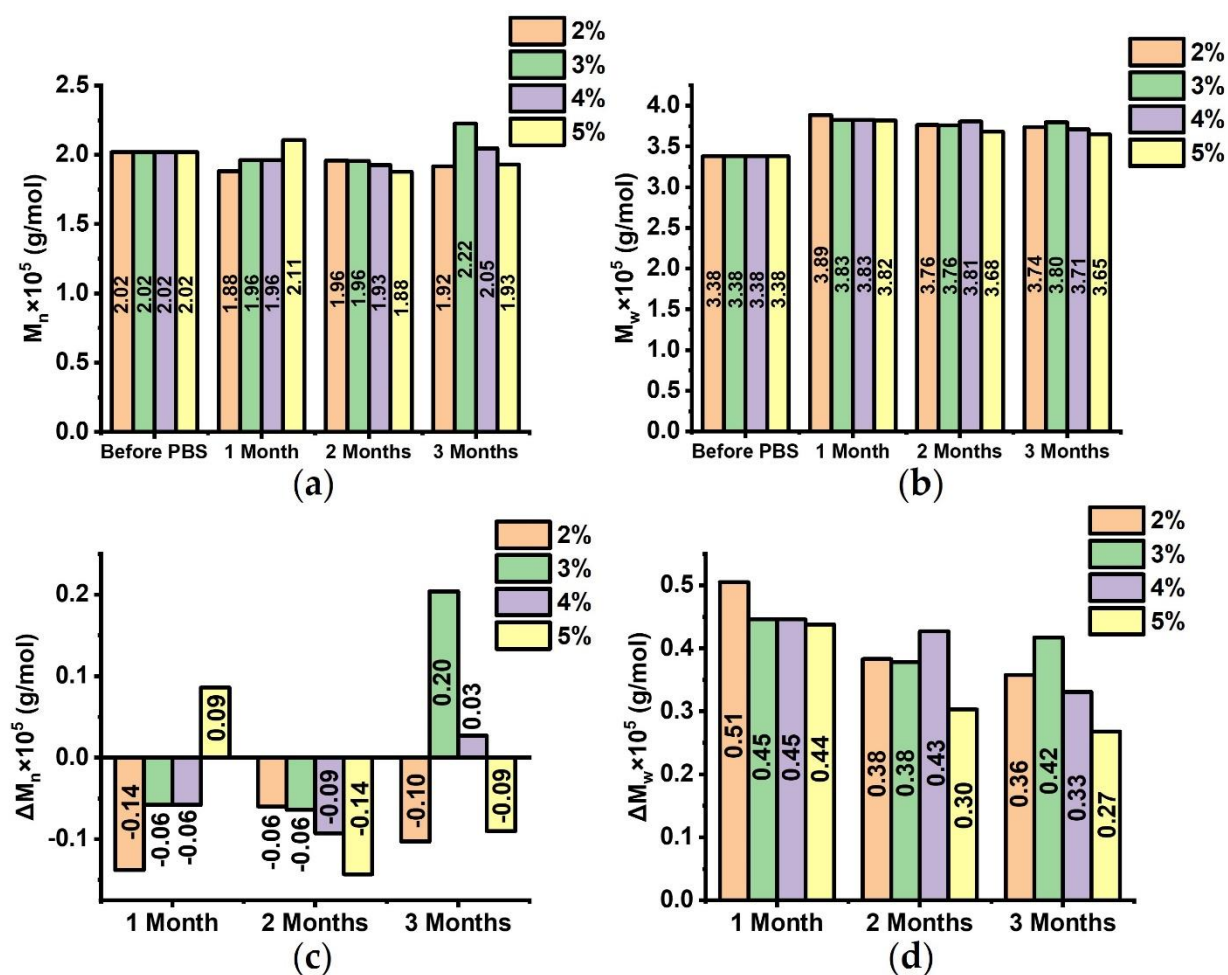

**Figure S8.** Molecular weights (number average molecular weight ( $M_n$ ) and molecular weight ( $M_w$ )) and molecular weight differences ( $\Delta M_n$ ,  $\Delta M_w$ ) of poly(lactide-co-glycolide) (PLGA) scaffolds prepared from electrospinning solutions with different PLGA concentrations (2, 3, 4 and 5 wt.%) dissolved in hexafluoro-2-propanol (HFIP), not immersed (Before PBS) and immersed in phosphate-buffered saline (PBS) for 1, 2 or 3 months: a)  $M_n$ , b)  $M_w$  c)  $\Delta M_n$  and d)  $\Delta M_w$ .

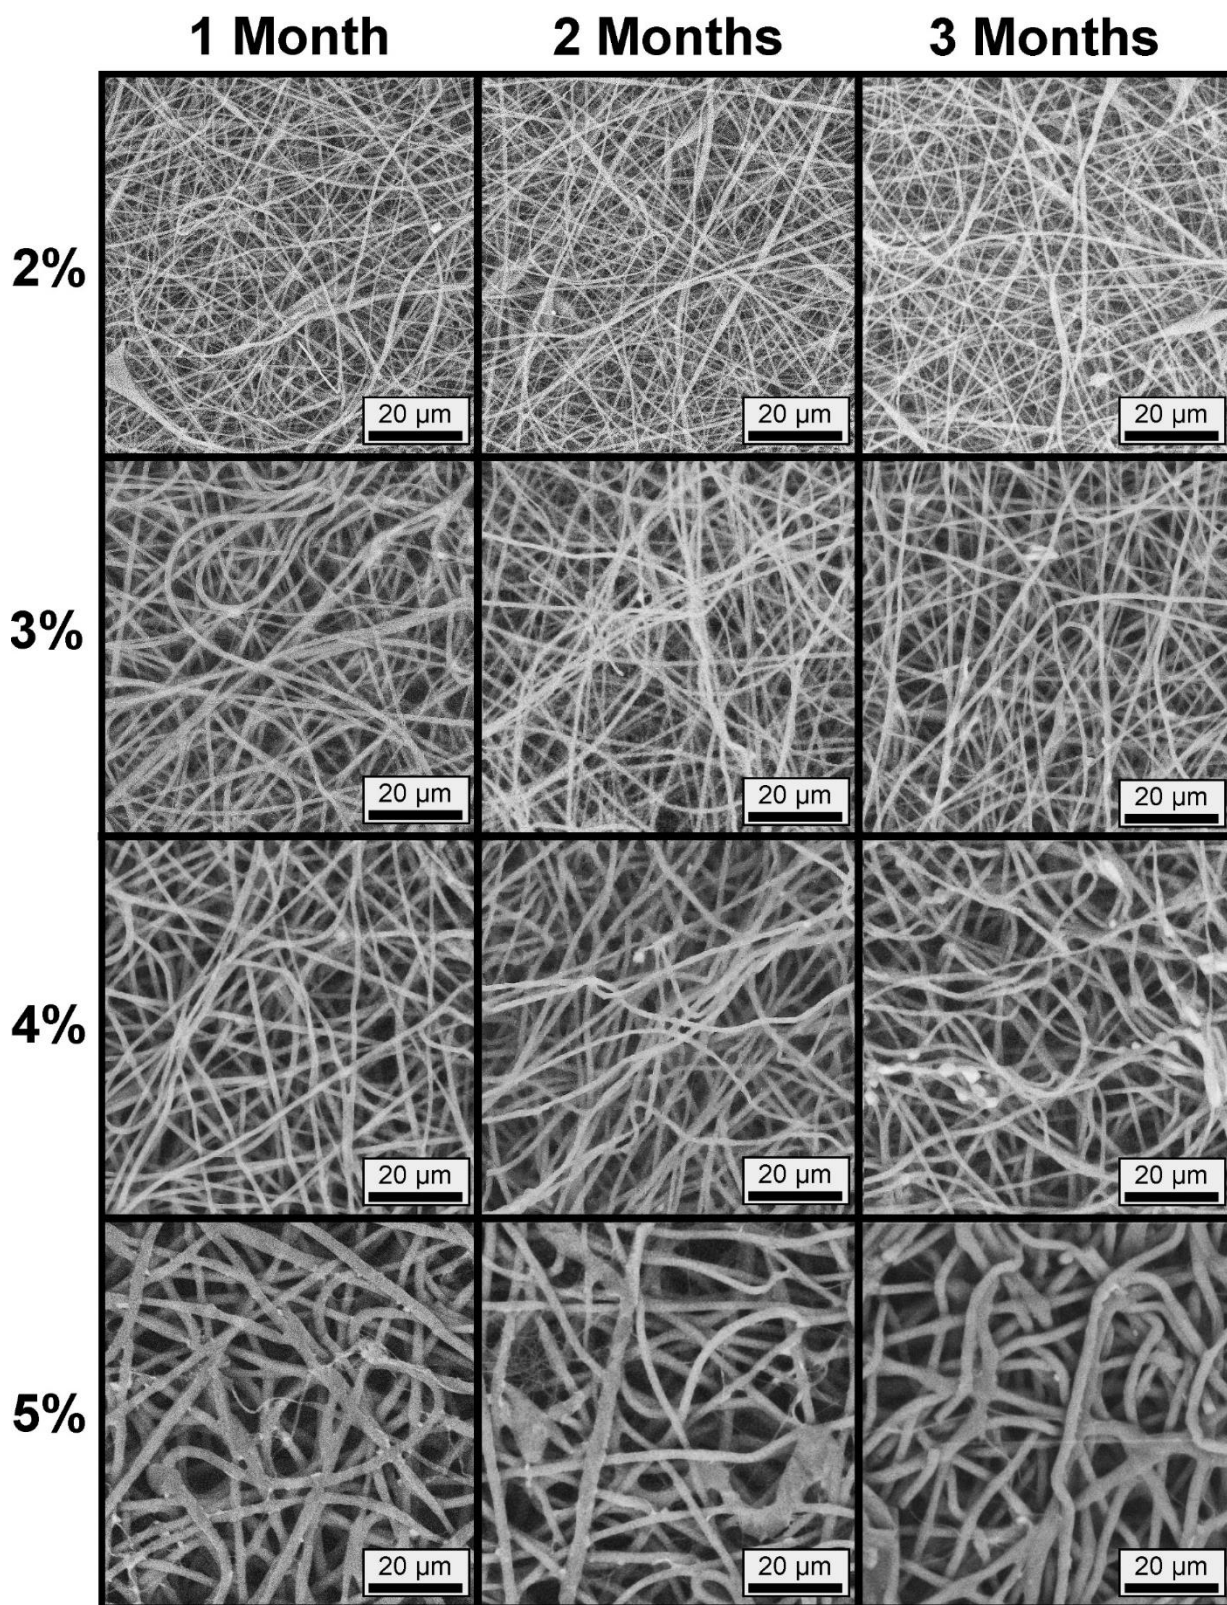

**Figure S9.** Scanning electron microscopy (SEM) micrographs at 1000 $\times$  magnification of poly(lactide-co-glycolide) (PLGA) scaffolds fabricated from electrospinning solutions with different PLGA concentrations (2, 3, 4 and 5 wt.%) and immersed in phosphate buffer saline (PBS) for 1, 2 or 3 months.



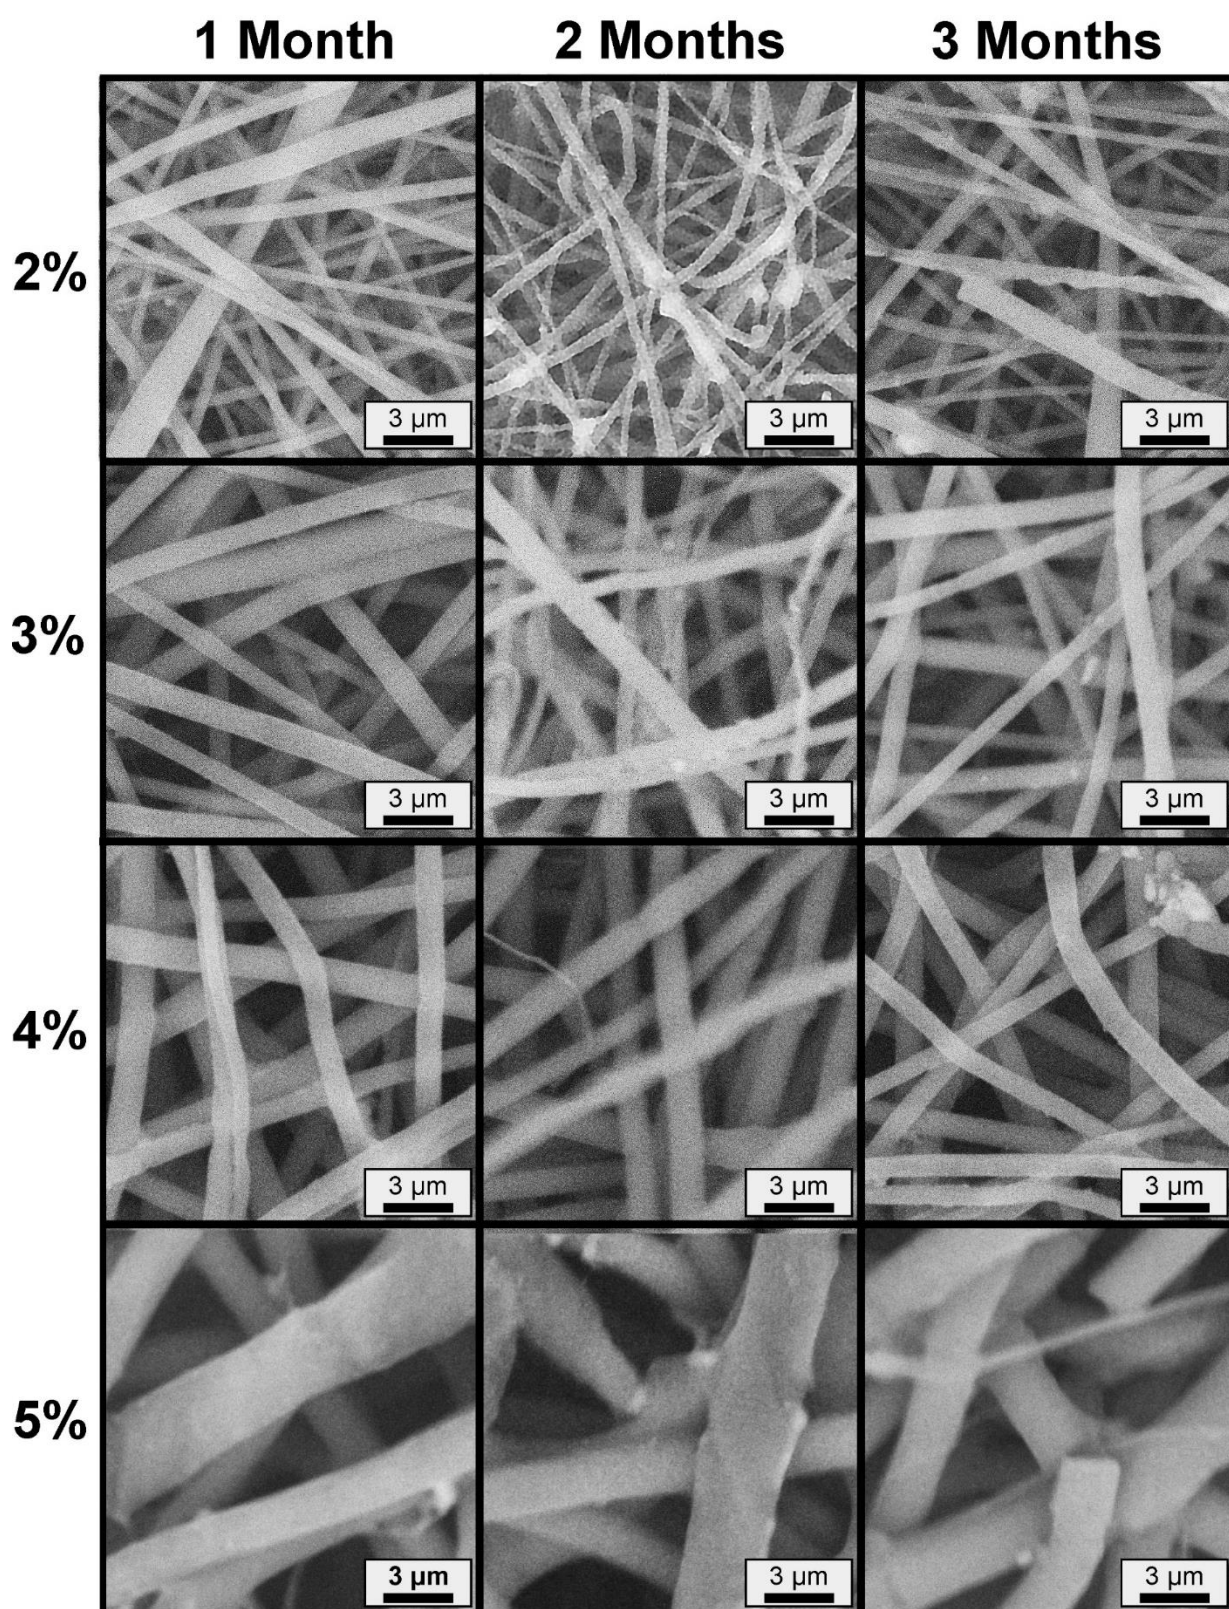

**Figure S10.** Scanning electron microscopy (SEM) micrographs at 5000× magnification of poly(lactide-co-glycolide) (PLGA) scaffolds fabricated from electrospinning solutions with different PLGA concentrations (2, 3, 4 and 5 wt.%) and immersed in phosphate buffer saline (PBS) for 1, 2 or 3 months.
