# Supplementary material
Source: MDPI journal article supplement (https://www.mdpi.com/2227-7080/11/5/137)
Supplement: s1 [file s1]

Archive with 1 entries (1 files):
- technologies-2560929-supplementary.pdf
